# Supplementary material for: Spin echo NMR spectra without J modulation
Source: Royal Society of Chemistry journal article supplement (doi:10.1039/c1cc16699a), 2011-11-11
Supplement: c1cc16699a.pdf [file c1cc16699a.pdf]

## Supporting Information

### PROJECT pulse sequence

```
; Juan Aguilar. Mathias Nilsson. Gareth Morris. Manchester. 2011.
; PROJECT sequence
; NB development version, minimum phase cycle, subject to change
; http://nmr.chemistry.manchester.ac.uk
; avance-version
; 1D sequence

#include <Avance.incl>
#include <Grad.incl>
#include <Delay.incl>

"p2=p1*2"
"p3=p1"
"d3=14*d2" ; Total T2 time

1 ze
2 30m
  d1
  p1 ph1
3 d2*0.25
  p2 ph2
  d2*0.25
  p3 ph3          /* 90d. Refocusing */
  d2*0.25
  p2 ph2
  d2*0.25
  lo to 3 times 14
  go=2 ph31
  30m mc #0 to 2 F0(zd)
exit

ph1=0 2          /* 90d */
ph2=1           /* 180d */
ph3=1 1 3 3     /* 90d refocusing */
ph31=0 2 0 2

;p11 : f1 channel - power level for pulse (default)
;p1  : f1 channel - 90 degree excitation pulse
;p2  : f1 channel - 180 degree refocusing pulse
;p3  : f1 channel - 90 degree refocusing pulse
;d1  : relaxation delay; 1-5 * T1
;d2  : Cycle time (2 echo times). T2 filter time= d2*14
;l4  : loop for T2 filter. Min value= 1 (2 echoes). T2 filter time= d2*14.
;ns : multiples of 4
```
